# Supplementary material
Source: Royal Society of Chemistry journal article supplement (doi:10.1039/d6ta00179c)
Supplement: d6ta00179c1.pdf [file d6ta00179c1.pdf]

## Supporting Information

### Thermo-adaptive gelatin-based hydrogel skin patch with switchable mechanics and adhesion for on-demand wearable sensing

Yuling Wu<sup>a</sup>, Yibin Lin<sup>a</sup>, Xiaoqing Su<sup>a</sup>, Jiakai Feng<sup>a</sup>, Yuxin Wu<sup>a</sup>, Simin Zhang<sup>a</sup>, Duoqu Chen<sup>a</sup>, Wenjing Lin<sup>a,b\*</sup>, Xiaofeng Lin<sup>a,b</sup>, Guobin Yi<sup>a,b,c\*</sup>

<sup>a</sup>*School of Chemical Engineering and Light Industry, Guangdong University of Technology, Guangzhou 510006, China*

<sup>b</sup>*Guangdong Provincial Laboratory of Chemistry and Fine Chemical Engineering Jiayang Center, Jiayang 515200, China*

<sup>c</sup>*School of Advanced Manufacturing, Guangdong University of Technology, Jiayang 522000, China*

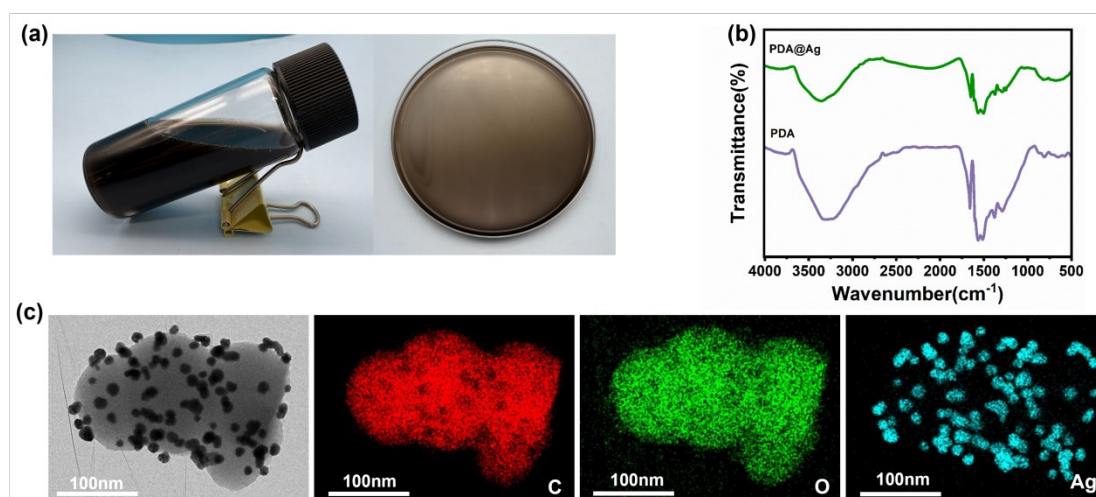

**Figure S1.** (a) Photograph of the hydrogel precursor solution and 10 mL precursor solution uniformly dispersed in a Petri dish. (b) FTIR spectra of PDA@Ag and PDA. (c) TEM image of PDA@Ag NPs, Element mappings of C, O and Ag.

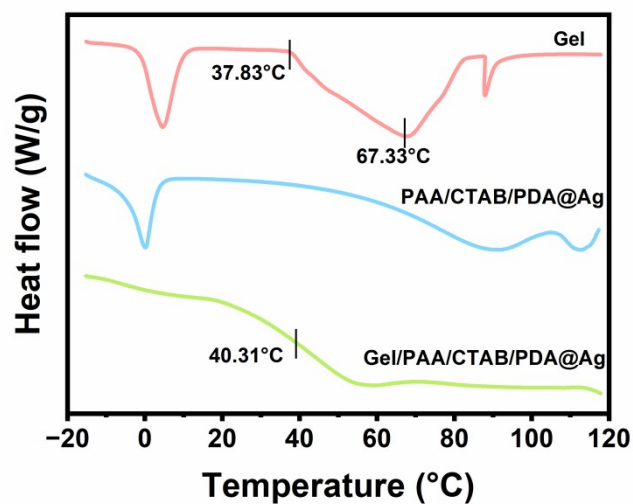

**Figure S2.** DSC curves of pure Gel, PAA/CTAB/PDA@Ag, and Gel/PAA/CTAB/PDA@Ag hydrogels

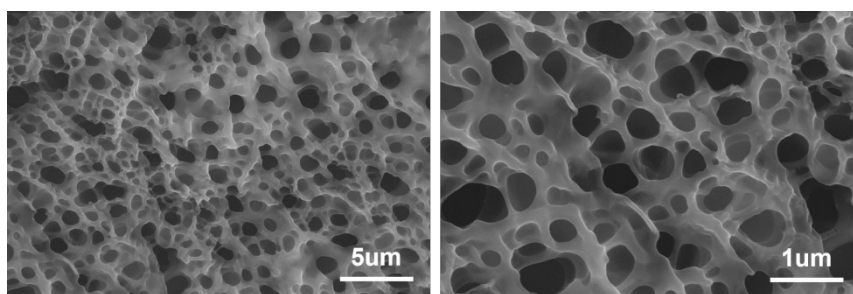

**Figure S3.** SEM images of the Gel/PAA/PDA@Ag/CTAB hydrogel at 5  $\mu\text{m}$  and 1  $\mu\text{m}$ .

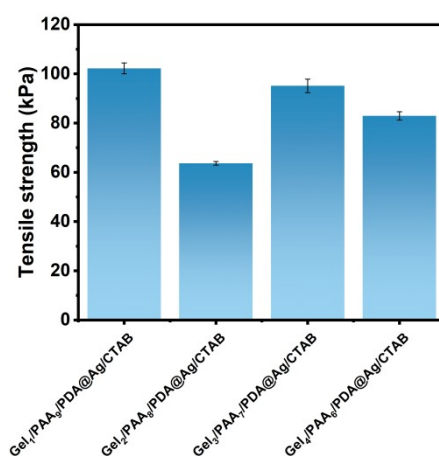

**Figure S4.** Histogram of tensile strength of Gel/PAA/PDA@Ag/CTAB hydrogel under different mass ratios of Gel to PAA (1:9, 2:8, 3:7, 4:6).

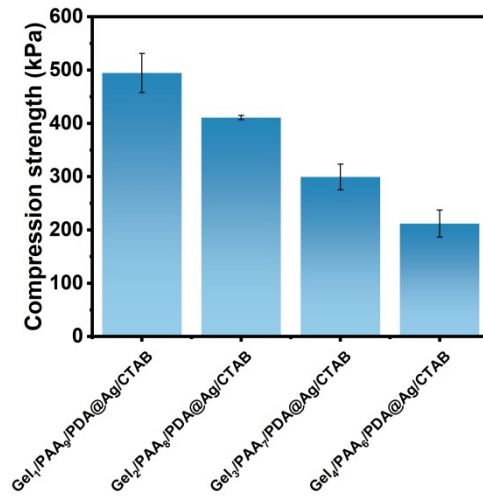

**Figure S5.** Histogram of compressive strength of Gel/PAA/PDA@Ag/CTAB hydrogel at different mass ratios of Gel to PAA (1:9, 2:8, 3:7, 4:6).

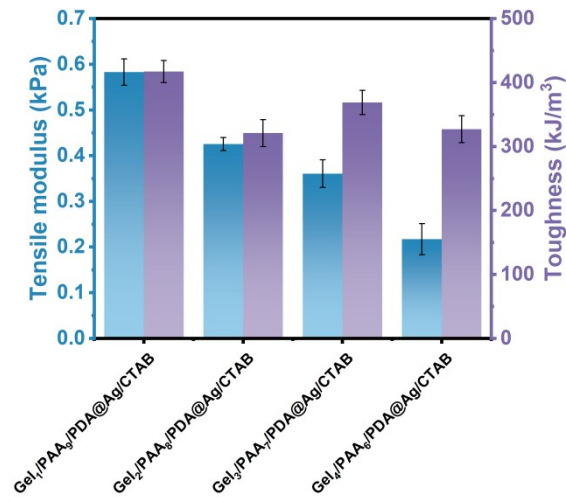

**Figure S6.** Histogram of tensile modulus and toughness of Gel/PAA/PDA@Ag/CTAB hydrogel at different mass ratios of Gel to PAA (1:9, 2:8, 3:7, 4:6).

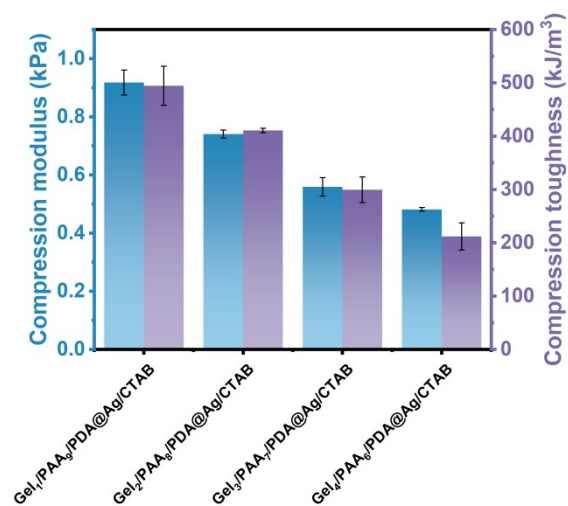

**Figure S7.** Histogram of compressive modulus and toughness of Gel/PAA/PDA@Ag/CTAB hydrogel at different mass ratios of Gel to PAA (1:9, 2:8, 3:7, 4:6).

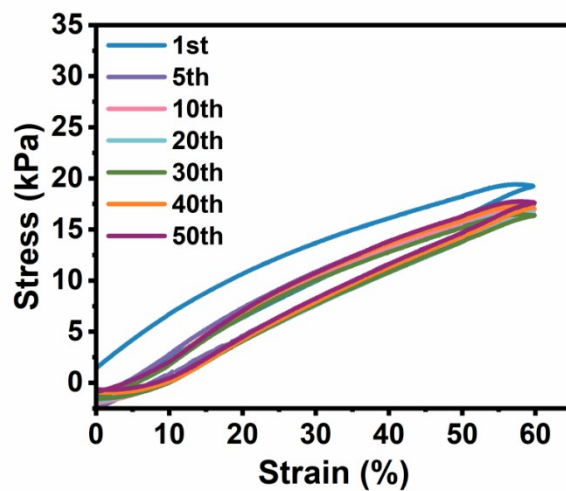

**Figure S8.** Loading-unloading curves of Gel<sub>3</sub>/PAA<sub>7</sub>/PDA@Ag/CTAB hydrogel for 50 cycles under 60% compressive strain at 25°C.

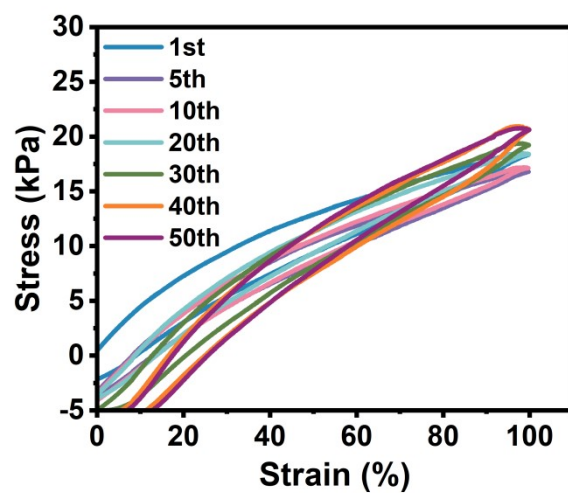

**Figure S9.** Loading-unloading curves of Gel<sub>3</sub>/PAA<sub>7</sub>/PDA@Ag/CTAB hydrogel for 50 cycles under 100% compressive strain at 25°C.

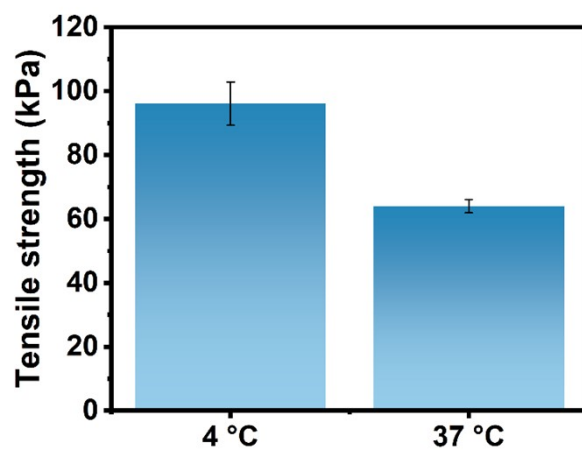

**Figure S10.** Histogram of tensile strength of Gel<sub>3</sub>/PAA<sub>7</sub>/PDA@Ag/CTAB hydrogel at 4°C and 37°C.

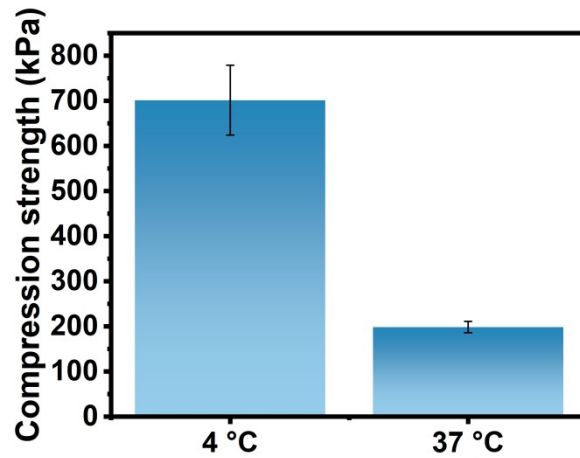

**Figure S11.** Histogram of compressive strength of Gel<sub>3</sub>/PAA<sub>7</sub>/PDA@Ag/CTAB hydrogel at 4°C and 37°C.

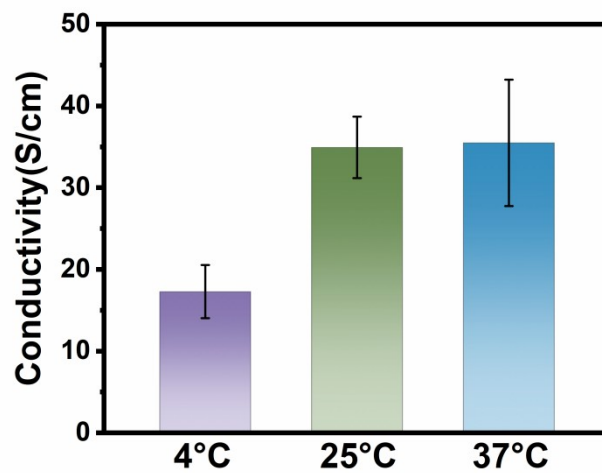

**Figure S12.** Conductivity at different temperatures (4°C, 25°C and 37°C), data are presented as the mean  $\pm$  standard deviation (SD) (n = 4).

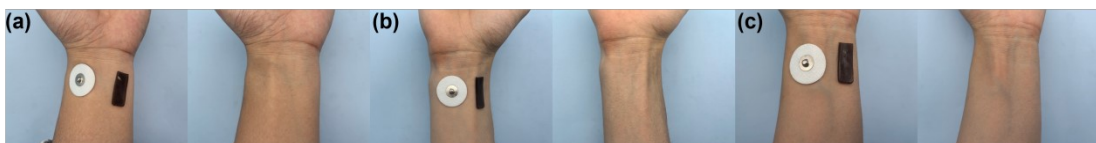

**Figure S13.** 24-hour human skin sensitization assessment of commercial medical electrode patches and hydrogel patches.

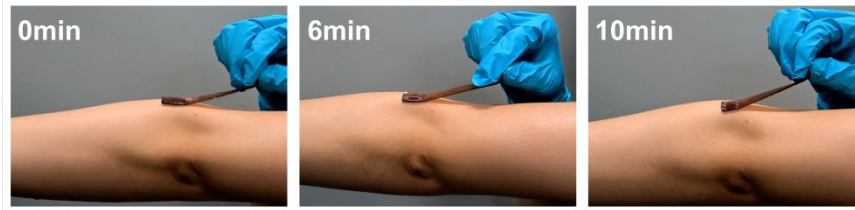

**Figure S14.** Adhesion photographs of the hydrogel at 0 min, 6 min, and 10 min after the start of "jumping" exercise.

**Table S1.** Multidimensional performance comparison of the thermosensitive hydrogel

| Materials           | adhesion strength (kPa) | Multi-tissues adhesion | adhesion MD simulatio n | Self-healing | Sensitivity (GF) | sensing range (%) | AI-sensing | Ref.             |
|---------------------|-------------------------|------------------------|-------------------------|--------------|------------------|-------------------|------------|------------------|
| MXene/gel/OHA/DES   | 14.38                   | NO                     | NO                      | NO           | 0.71             | /                 | YES        | 15               |
| PAM/Gel/SA          | 9.8                     | NO                     | NO                      | NO           | /                | /                 | NO         | 17               |
| Gel/PAM             | 0.68                    | NO                     | NO                      | NO           | 0.835            | 800               | NO         | 43               |
| PAM/Gel/TA-CNT      | 5.46                    | NO                     | NO                      | NO           | 5.5              | 500               | NO         | 44               |
| DI@GA hydrogels     | 2.8                     | NO                     | NO                      | YES          | NO               | /                 | NO         | 45               |
| Gel/PAA/PDA@Ag/CTAB | 25.66                   | YES                    | YES                     | YES          | 13.55            | 500               | YES        | <b>This work</b> |
